# Supplementary material for: Boosting solar hydrogen production with polarized MOF-derived ferroelectric In2Se3/In2O3 nanohybrids
Source: Royal Society of Chemistry journal article supplement (doi:10.1039/d4ta03761h), 2024-01-01
Supplement: d4ta03761h1.pdf [file d4ta03761h1.pdf]

## Supporting Information

### Boosting Solar Hydrogen Production with Polarized MOF-Derived Ferroelectric In<sub>2</sub>Se<sub>3</sub>/In<sub>2</sub>O<sub>3</sub> Nanohybrids

Li Shi<sup>a,b</sup>, Daniele Benetti<sup>a,c\*</sup>, Faying Li<sup>a,b</sup>, Catalin Harnagea<sup>a</sup>, Qin Wei<sup>b,d\*</sup>, and Federico Rosei<sup>a,e\*</sup>

<sup>a</sup> *Centre for Energy, Materials and Telecommunications, Institut National de la Recherche Scientifique, 1650 Boul. Lionel-Boulet, Varennes, QC J3X1S2, Canada*

<sup>b</sup> *Key Laboratory of Interfacial Reaction & Sensing Analysis in Universities of Shandong, School of Chemistry and Chemical Engineering, University of Jinan, Jinan 250022, PR China*

<sup>c</sup> *Department of Chemistry, McGill University, 801 Sherbrooke Street West, Montreal, Quebec, H3A 0B8 Canada*

<sup>d</sup> *Department of Chemistry, Sungkyunkwan University, Suwon, 16419, Republic of Korea*

<sup>e</sup> *Department of Chemical and Pharmaceutical Sciences, University of Trieste, Via Giorgeri 1, 34127 Trieste (Italy)*

\* Corresponding author: [daniele.benetti@inrs.ca](mailto:daniele.benetti@inrs.ca) (D.B.) Present Address: Department of Chemistry, Imperial College London, W12 0BZ, London, United Kingdom; [chm\\_weiq@ujn.edu.cn](mailto:chm_weiq@ujn.edu.cn) (Q.W.); [federico.rosei@units.it](mailto:federico.rosei@units.it) (F.R.)

# Table of Contents

|                                                                                                                                                                                                                                                          |         |
|----------------------------------------------------------------------------------------------------------------------------------------------------------------------------------------------------------------------------------------------------------|---------|
| Experimental details.....                                                                                                                                                                                                                                | Page 1  |
| Online gas chromatography for measuring H <sub>2</sub> evolution.....                                                                                                                                                                                    | Page 2  |
| Figure S1. XRD patterns of x%-In <sub>2</sub> Se <sub>3</sub> /In <sub>2</sub> O <sub>3</sub> .....                                                                                                                                                      | Page 3  |
| Figure S2. TGA curves of the as-obtained 20% Se powder-MIL-68(In).....                                                                                                                                                                                   | Page 4  |
| Figure S3. SEM and TEM images of MIL-68(In) and 20%-In <sub>2</sub> Se <sub>3</sub> /In <sub>2</sub> O <sub>3</sub> .....                                                                                                                                | Page 5  |
| Figure S4. EDX and line scan of MIL-68(In) and 20%-In <sub>2</sub> Se <sub>3</sub> /In <sub>2</sub> O <sub>3</sub> .....                                                                                                                                 | Page 6  |
| Figure S5. XPS survey spectra of In <sub>2</sub> O <sub>3</sub> .....                                                                                                                                                                                    | Page 7  |
| Figure S6. XPS survey spectra of In <sub>2</sub> Se <sub>3</sub> .....                                                                                                                                                                                   | Page 8  |
| Figure S7. Ferroelectric hysteresis loops for In <sub>2</sub> O <sub>3</sub> and In <sub>2</sub> Se <sub>3</sub> nanorods.....                                                                                                                           | Page 9  |
| Figure S8. UV-DRS spectra and Tauc plots of x%-In <sub>2</sub> Se <sub>3</sub> /In <sub>2</sub> O <sub>3</sub> .....                                                                                                                                     | Page 10 |
| Figure S9. UPS spectra and the energy levels for In <sub>2</sub> O <sub>3</sub> and In <sub>2</sub> Se <sub>3</sub> .....                                                                                                                                | Page 11 |
| Figure S10. Plain-view, cross-sectional SEM image, and EDS mapping of 20%-In <sub>2</sub> Se <sub>3</sub> /In <sub>2</sub> O <sub>3</sub> photoanode.....                                                                                                | Page 12 |
| Figure S11. Photocurrent density of In <sub>2</sub> Se <sub>3</sub> with no poling, +3 V poling, and -3 V poling and Summary of chopped illumination poling.....                                                                                         | Page 13 |
| Figure S12. Photocurrent density of In <sub>2</sub> O <sub>3</sub> with no poling, +3 V poling, and -3 V poling and Summary of chopped illumination poling.....                                                                                          | Page 14 |
| Figure S13. Photocurrent density of 20%-In <sub>2</sub> Se <sub>3</sub> /In <sub>2</sub> O <sub>3</sub> with no poling, +3 V poling, and -3 V poling.....                                                                                                | Page 15 |
| Figure S14. EIS of 20%-In <sub>2</sub> Se <sub>3</sub> /In <sub>2</sub> O <sub>3</sub> with 0 V poling, -3 V poling, and +3 V poling and H <sub>2</sub> evolution of 20%-In <sub>2</sub> Se <sub>3</sub> /In <sub>2</sub> O <sub>3</sub> photoanode..... | Page 16 |
| Table S1 The values of the R <sub>CT</sub> .....                                                                                                                                                                                                         | page 17 |
| Table S2 Summary of the performance of In <sub>2</sub> O <sub>3</sub> -based photoanode .....                                                                                                                                                            | page 18 |
| References                                                                                                                                                                                                                                               |         |

## EXPERIMENTAL DETAILS

**Synthesis of MIL-68(In)-MOFs nanorod precursor:** A modified version of MIL-68(In) was prepared according to previous literature<sup>1</sup>. Typically, a mixture milky solution was prepared by mixing 1,4-benzenedicarboxylic acid (H<sub>2</sub>BDC, 0.8 mol, 32 mg) and In(NO<sub>3</sub>)<sub>3</sub> xH<sub>2</sub>O (0.8 mol, 256 mg) in 30 mL of DMF. Afterwards, the mixture was heated in an oil bath (120 °C) for 30 mins. Upon cooling down, the final white products were centrifuged and washed with DMF and methanol three times, respectively. The collected materials were then dried in an oven overnight at 80 °C.

**Synthesis of pure In<sub>2</sub>O<sub>3</sub> and ferroelectric x%-In<sub>2</sub>Se<sub>3</sub>/In<sub>2</sub>O<sub>3</sub>:** 0.5 g of the MIL-68(In) powder was annealed in a tube furnace in N<sub>2</sub> atmosphere to 500 °C with a ramp-rate of 2 °C/min and held for 120 min. After naturally cooling, black powders of pure In<sub>2</sub>O<sub>3</sub> were obtained. MIL-68(In) nanorod and Se powder with different mass ratios (0%, 20%, and 40%) were uniformly mixed by grinding with a mortar and pestle. Then, the mixture was transferred to a porcelain boat and heated at 500 °C for 2 h with a ramping rate of 2 °C/min in nitrogen atmosphere. After naturally cooling, brown powders of pure In<sub>2</sub>Se<sub>3</sub>/In<sub>2</sub>O<sub>3</sub> were obtained. When the mass ratio of Se to MIL-68(In) is 40%, which is marked 40%-In<sub>2</sub>Se<sub>3</sub>/In<sub>2</sub>O<sub>3</sub>, there will be only In<sub>2</sub>Se<sub>3</sub> exist (dark red) (see details in Figure. S1).

**Online gas chromatography to measure the H<sub>2</sub> evolution:** A gas-tight cell (total volume: 50 mL) was used for online gas chromatography (GC) and it was filled with 20 mL electrolyte in a three-electrode cell configuration, using a M-TiO<sub>2</sub>/CdSe@CdS photoanode as working electrode, an Ag/AgCl saturated reference electrode and a Pt plate as working electrode. Ar was used as carrier gas at a flow rate of 20 sccm and the electrolyte was continuously stirred. Before the measurements, the electrolyte was saturated with Ar gas for at least 30 minutes. A gas outlet was connected to a gas chromatograph (Perkin Elmer Clarus 580 GC) for periodical sampling. A thermal conductivity detector (TCD) was used for detecting H<sub>2</sub>. A gas aliquot was automatically injected into the GC every 180 s. During the online GC, a chronoamperometric measurement was performed by applying a 1.4 V vs RHE potential for 1.5 h.

The theoretical number of moles of hydrogen evolved can be calculated from Faraday's 2<sup>nd</sup> law of electrolysis according to the following equation:

$$n_{H_2}(\text{theoretical}) = \frac{Q}{zF} = \frac{I \times t}{zF}$$

Where  $n_{H_2}$  is the number of moles of hydrogen produced,  $Q$  is the total charge passed during electrolysis,  $z$  is the number of electrons transferred during HER (i.e.  $z = 2$ ),  $I$  is the applied current,  $t$  is the electrolysis time in seconds, and  $F$  is the Faraday constant 96 485.33 C mol<sup>-1</sup>.

The Faradaic efficiency was calculated as follows:

$$\eta_{\text{Faradaic}} = \frac{n_{H_2}(\text{experimental})}{n_{H_2}(\text{theoretical})} \times 100\%$$

For example, according to gas chromatography after 5400s, the H<sub>2</sub> gas evolved was  $5.847 \times 10^{-6}$  mol, whereas the current obtained by chronoamperometry is 0.26 mA.

$$n_{H_2}(\text{theoretical}) = \frac{0.00026 (A) \times 5400 (s)}{2 \times 96485.33 C \cdot mol^{-1}} = 7.27 \times 10^{-6} mol$$

Consequently,

$$\eta_{Faradaic} = \frac{5.85 \times 10^{-6} \text{ mol}}{7.27 \times 10^{-6} \text{ mol}} = 80.47\%$$

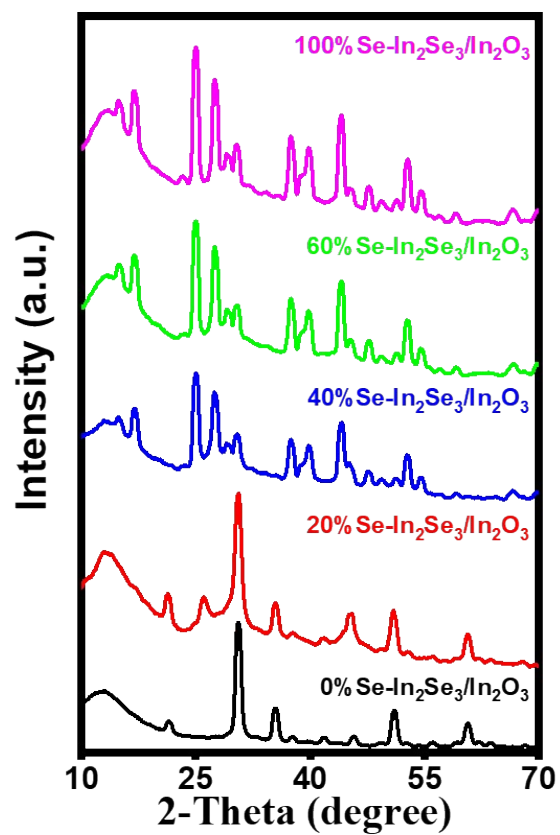

**Figure S1.** Comparative XRD patterns of In<sub>2</sub>O<sub>3</sub> (0%-In<sub>2</sub>Se<sub>3</sub>/In<sub>2</sub>O<sub>3</sub>), 20%-In<sub>2</sub>Se<sub>3</sub>/In<sub>2</sub>O<sub>3</sub>, 40%-In<sub>2</sub>Se<sub>3</sub>/In<sub>2</sub>O<sub>3</sub>, 60%-In<sub>2</sub>Se<sub>3</sub>/In<sub>2</sub>O<sub>3</sub>, 80%-In<sub>2</sub>Se<sub>3</sub>/In<sub>2</sub>O<sub>3</sub>, In<sub>2</sub>Se<sub>3</sub> (100%-In<sub>2</sub>Se<sub>3</sub>/In<sub>2</sub>O<sub>3</sub>).

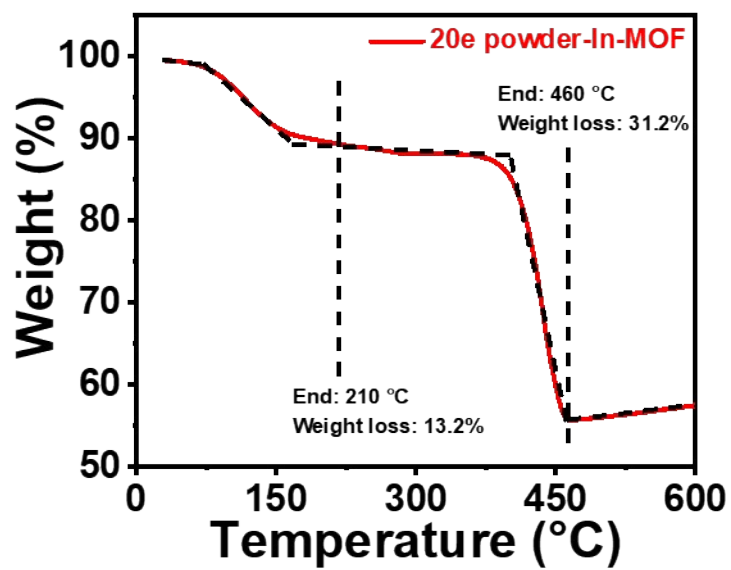

Figure S2. TGA curves of the as-obtained 20% Se powder-MIL-68(In).



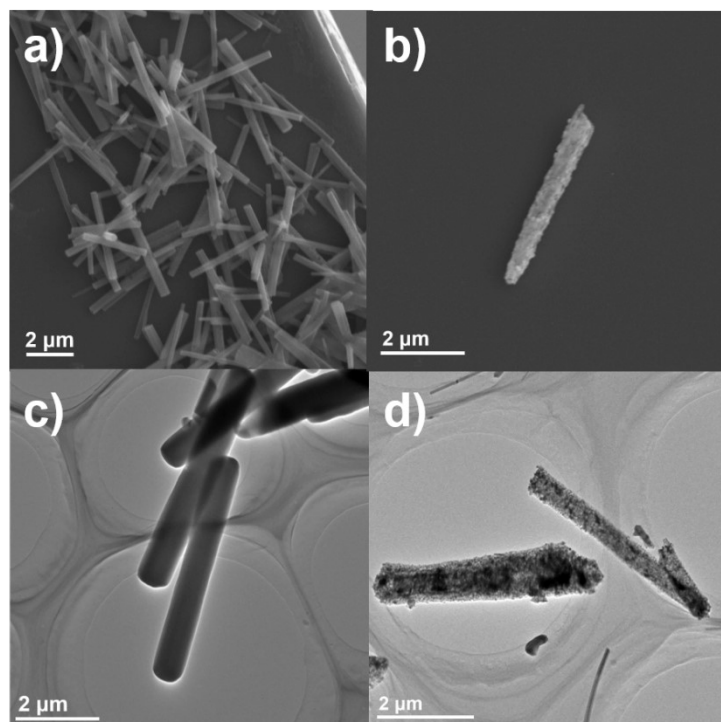

**Figure S3.** SEM and TEM images of In-MIL-68 (a and c) and 20%-In<sub>2</sub>Se<sub>3</sub>/In<sub>2</sub>O<sub>3</sub> composite (b and d).

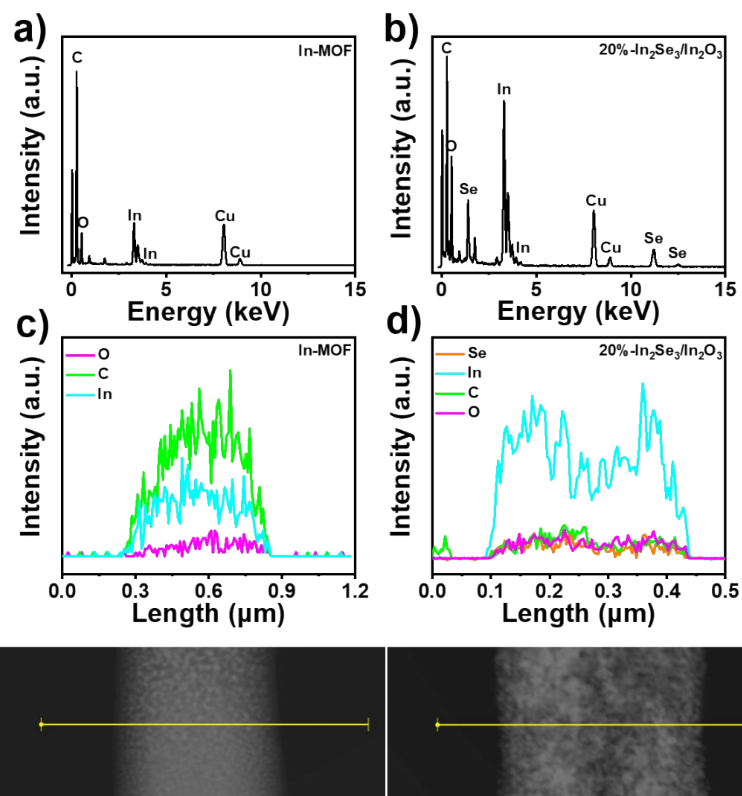

**Figure S4.** EDX spectrum of In-MIL-68 (a) and 20%- $\text{In}_2\text{Se}_3/\text{In}_2\text{O}_3$  composite (b) (Cu substrate). EDX line scan of In-MIL-68 (c) and 20%- $\text{In}_2\text{Se}_3/\text{In}_2\text{O}_3$  composite (d).

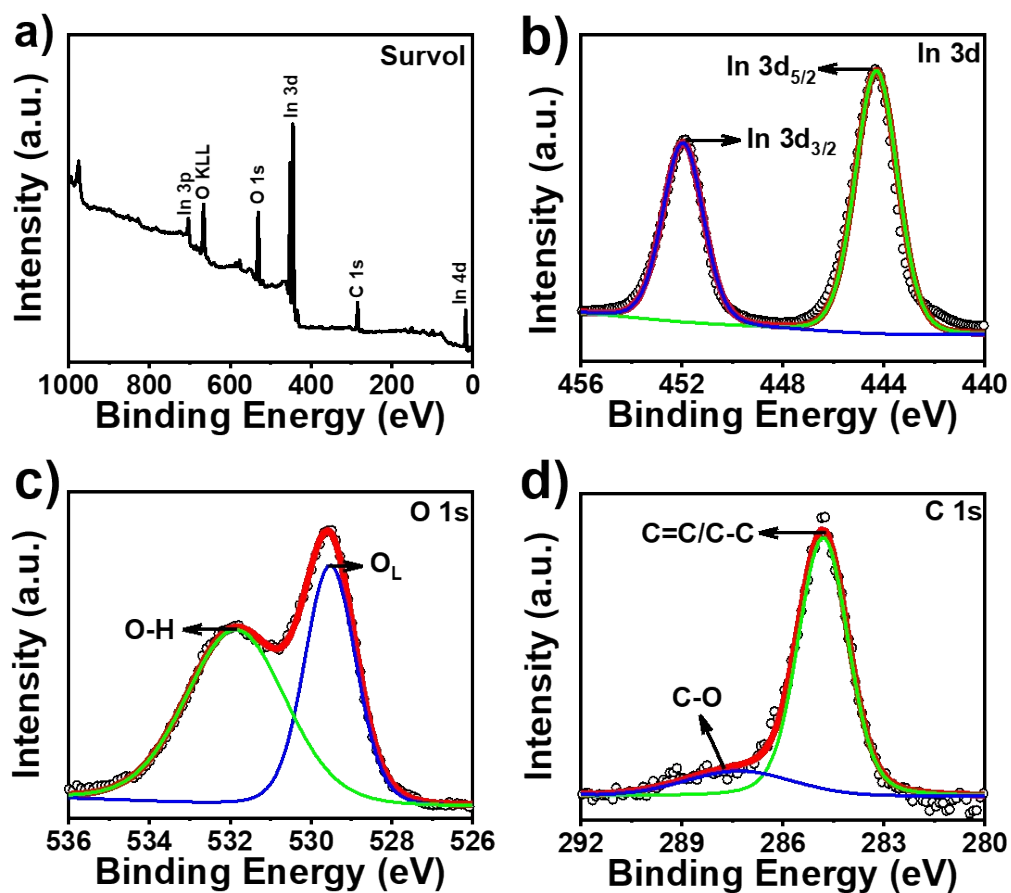

Figure S5. XPS survey spectra of (a)  $\text{In}_2\text{O}_3$ . High resolution In 3d spectra (b). High resolution O 1s spectra (c) and (d) High resolution C 1s spectra.

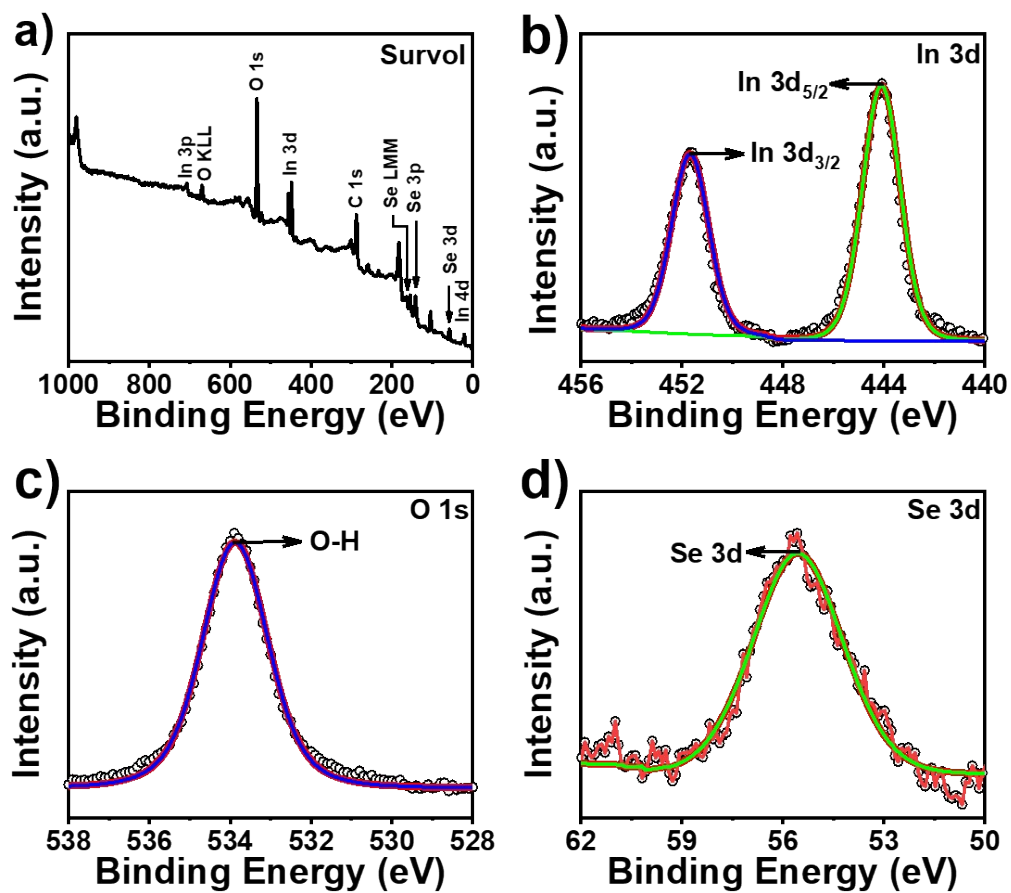

Figure S6. XPS survey spectra of (a)  $\text{In}_2\text{Se}_3$ . High resolution In 3d spectra (b). High resolution O 1s spectra (c) and (d) High resolution C 1s spectra.

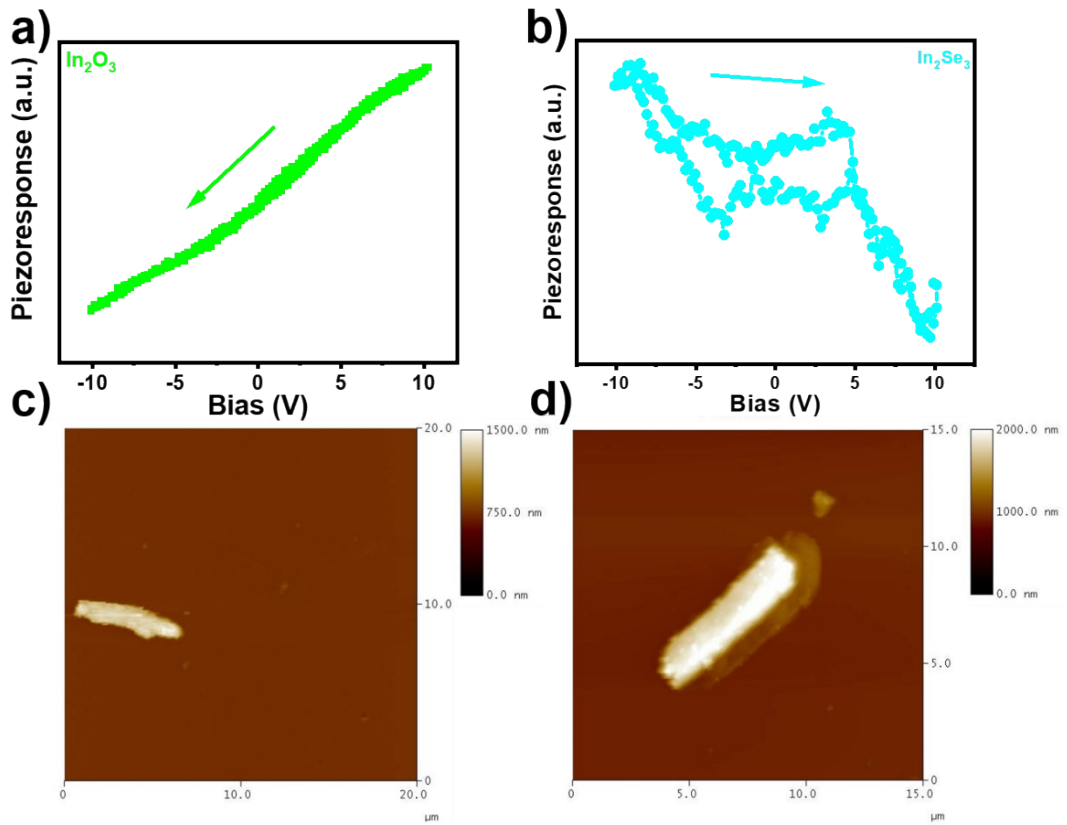

**Figure S7.** (a and b) Local ferroelectric hysteresis loops for  $\text{In}_2\text{O}_3$  and  $\text{In}_2\text{Se}_3$  nanorods; (c and d) AFM topographic image representation of an individual  $\text{In}_2\text{O}_3$  and  $\text{In}_2\text{Se}_3$  nanorods lying on Pt coated silicon substrate surface.

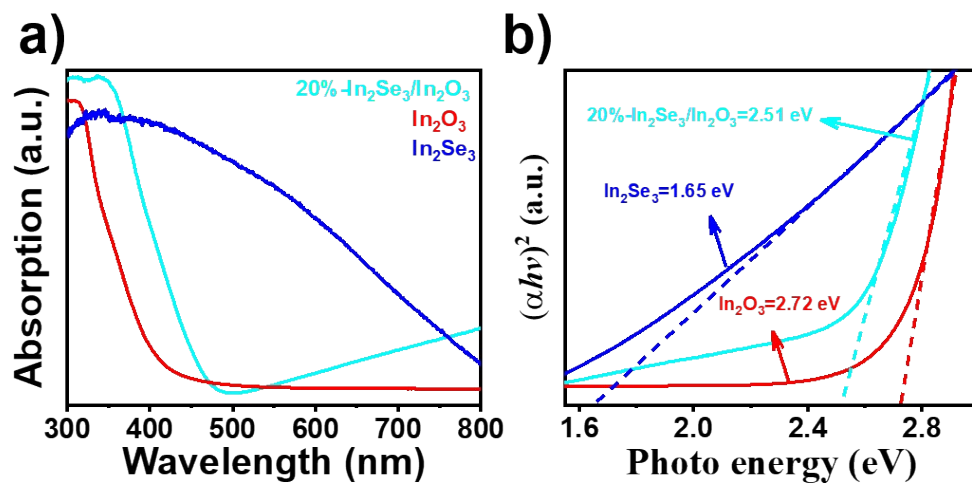

**Figure S8.** (a) UV-DRS spectra of  $\text{In}_2\text{O}_3$ , 20%  $\text{-In}_2\text{Se}_3/\text{In}_2\text{O}_3$ , and  $\text{In}_2\text{Se}_3$  (b) The extrapolation of Tauc plots  $(\alpha h\nu)^2$  versus photon energy ( $h\nu$ ) for  $\text{In}_2\text{O}_3$ , 20%  $\text{-In}_2\text{Se}_3/\text{In}_2\text{O}_3$ , and  $\text{In}_2\text{Se}_3$ .

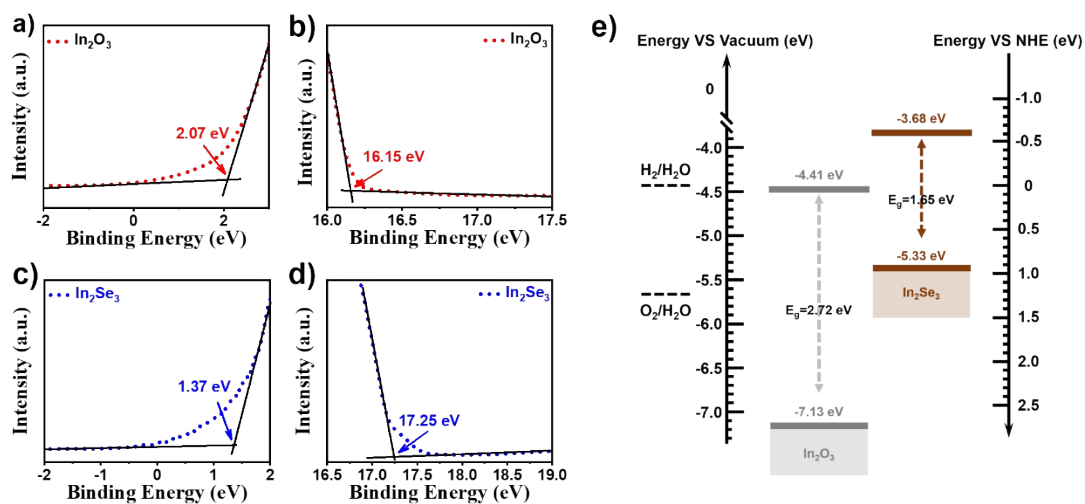

**Figure S9.** High binding energy cut-off (a and c) and low binding energy cut-off (b and d) of UPS spectra of  $\text{In}_2\text{O}_3$  and  $\text{In}_2\text{Se}_3$ . (e) Summary of the energy levels obtained from UPS measurements.

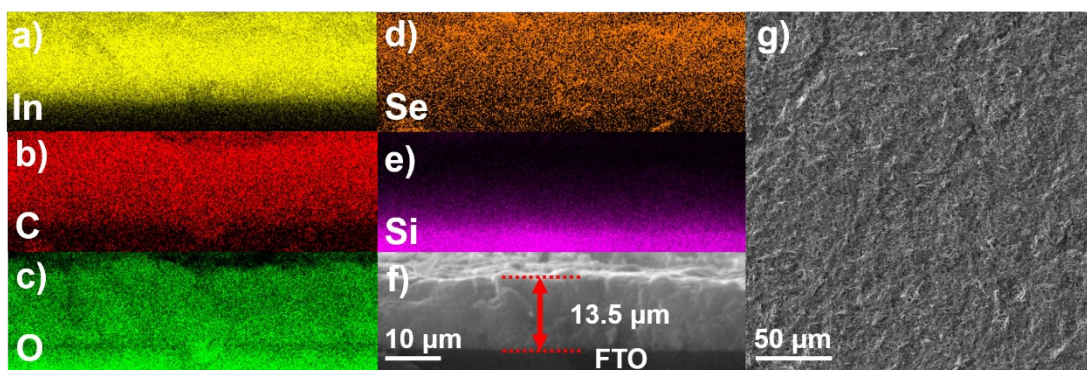

**Figure S10.** plain-view and cross-sectional SEM image of 20%- $\text{In}_2\text{Se}_3/\text{In}_2\text{O}_3$  composite (f and g); EDS mapping analysis of all the elements in relevant 20%- $\text{In}_2\text{Se}_3/\text{In}_2\text{O}_3$  electrode including (a) In, (b) C, (c) O, (d) Se, (e) Si.



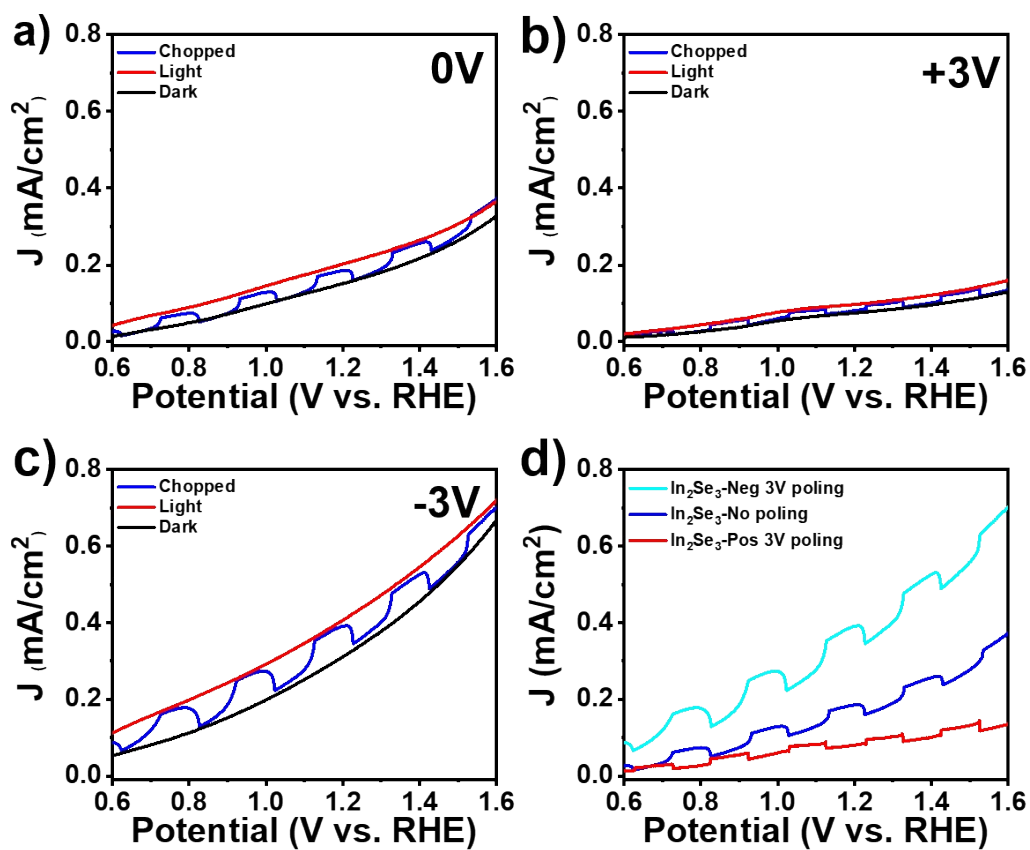

**Figure S11.** Photocurrent density of (a) In<sub>2</sub>Se<sub>3</sub> with no poling; (b) In<sub>2</sub>Se<sub>3</sub> with +3 V poling; (c) In<sub>2</sub>Se<sub>3</sub> with -3 V poling under dark, continuous and chopped illumination (AM 1.5 G, 100 mW cm<sup>-2</sup>); (d) Summary of chopped illumination of In<sub>2</sub>Se<sub>3</sub> with no poling, +3 V poling, and -3 V poling.

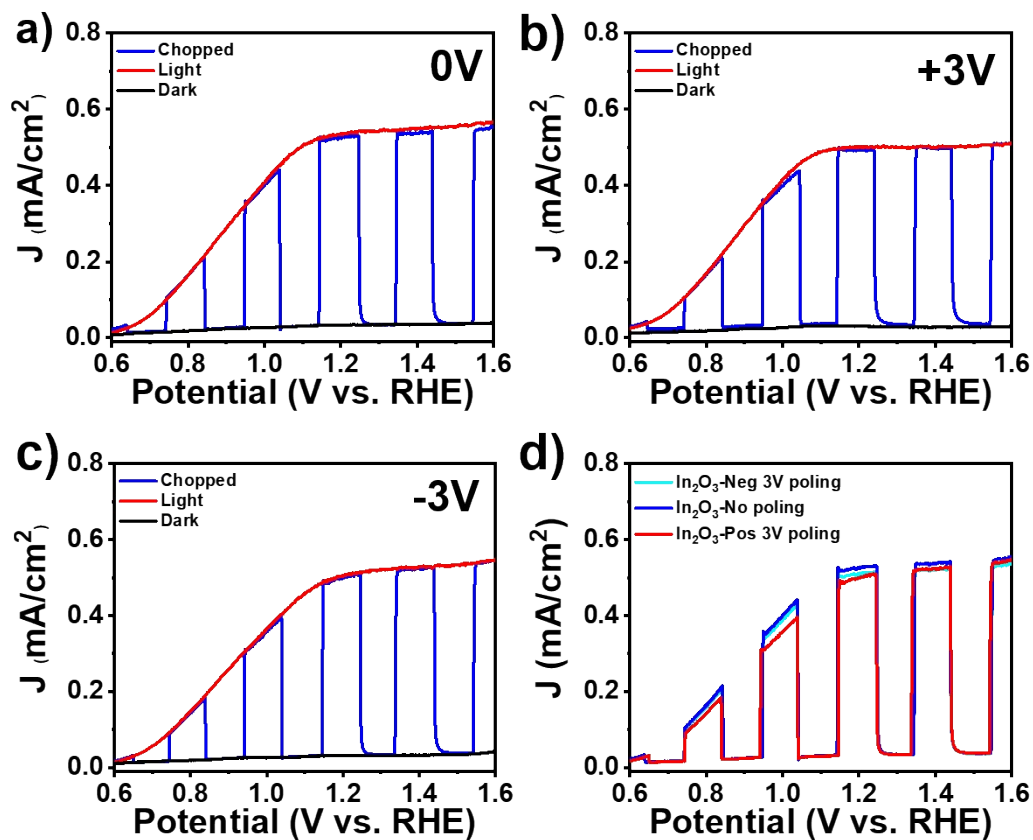

**Figure S12.** Photocurrent density of (a) In<sub>2</sub>O<sub>3</sub> with no poling; (b) In<sub>2</sub>O<sub>3</sub> with +3 V poling; (c) In<sub>2</sub>O<sub>3</sub> with -3 V poling under dark, continuous and chopped illumination (AM 1.5 G, 100 mW cm<sup>-2</sup>); (d) Summary of chopped illumination of In<sub>2</sub>O<sub>3</sub> with no poling, +3 V poling, and -3 V poling.

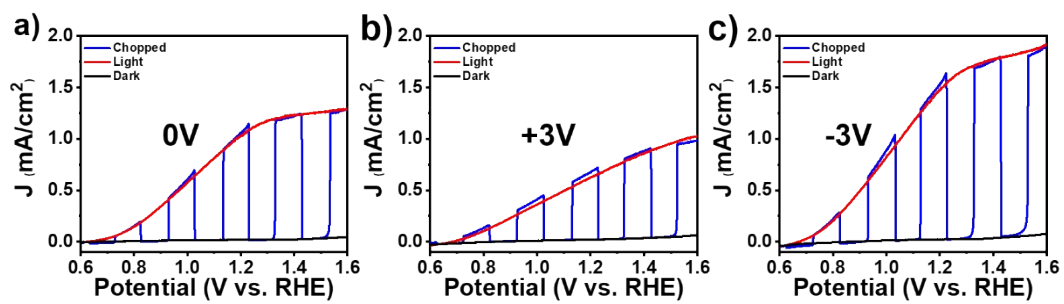

**Figure S13.** Photocurrent density of (a) 20%-In<sub>2</sub>Se<sub>3</sub>/In<sub>2</sub>O<sub>3</sub> with no poling; (b) 20%-In<sub>2</sub>Se<sub>3</sub>/In<sub>2</sub>O<sub>3</sub> with +3 V poling; (c) 20%-In<sub>2</sub>Se<sub>3</sub>/In<sub>2</sub>O<sub>3</sub> with -3 V poling under dark, continuous and chopped illumination (AM 1.5 G, 100 mW cm<sup>-2</sup>);

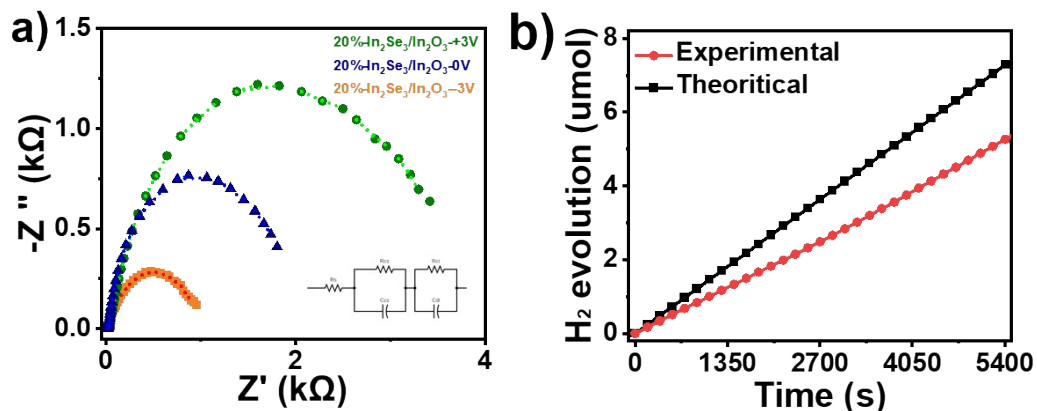

**Figure S14.** (a) Nyquist plots of 20%- $In_2Se_3/In_2O_3$  with 0 V poling, -3 V poling, and +3 V poling (the inset is equivalent circuit). (b)  $H_2$  evolution of 20%- $In_2Se_3/In_2O_3$  composite as a function of time at 1.4 V vs RHE under 100  $mW/cm^2$  illumination with AM 1.5 G filter. The evolution of  $H_2$  exhibits a nearly linear increase over time (solid red curve, approximately 3.72  $\mu mol/h$ ).  $H_2$  evolution is also calculated from the measured current (solid black curve).

**Table S1** the values of the  $R_{CT}$

| Sample                                                                    | $R_{ct}$ (k $\Omega$ ) |
|---------------------------------------------------------------------------|------------------------|
| 20%-In <sub>2</sub> Se <sub>3</sub> /In <sub>2</sub> O <sub>3</sub> + 3 V | 38.46                  |
| 20%-In <sub>2</sub> Se <sub>3</sub> /In <sub>2</sub> O <sub>3</sub> 0 V   | 24.73                  |
| 20%-In <sub>2</sub> Se <sub>3</sub> /In <sub>2</sub> O <sub>3</sub> - 3 V | 17.71                  |

**Table S2** Comparison of the PEC performance of some representative In<sub>2</sub>O<sub>3</sub> photocatalysts with literature

| Photocathode                                                              | Electrolyte                                                         | Light Source | Photocurrent density (mA cm <sup>-2</sup> )         | Ref.                |
|---------------------------------------------------------------------------|---------------------------------------------------------------------|--------------|-----------------------------------------------------|---------------------|
| <b>In<sub>2</sub>O<sub>3</sub></b>                                        | <b>1 M NaOH</b>                                                     | <b>1 Sun</b> | <b>0.36 (1.6 V vs RHE)</b>                          | <b>Present work</b> |
| <b>In<sub>2</sub>Se<sub>3</sub></b>                                       | <b>1 M NaOH</b>                                                     | <b>1 Sun</b> | <b>0.7 (1.6 V vs RHE)</b>                           | <b>Present work</b> |
| <b>20% In<sub>2</sub>Se<sub>3</sub>/In<sub>2</sub>O<sub>3</sub> (+3V)</b> | <b>1 M NaOH</b>                                                     | <b>1 Sun</b> | <b>1.29 (1.6 V vs RHE)</b>                          | <b>Present work</b> |
| <b>20% In<sub>2</sub>Se<sub>3</sub>/In<sub>2</sub>O<sub>3</sub> (0V)</b>  | <b>1 M NaOH</b>                                                     | <b>1 Sun</b> | <b>0.99 (1.6 V vs RHE)</b>                          | <b>Present work</b> |
| <b>20% In<sub>2</sub>Se<sub>3</sub>/In<sub>2</sub>O<sub>3</sub> (-3V)</b> | <b>1 M NaOH</b>                                                     | <b>1 Sun</b> | <b>1.91 (1.6 V vs RHE)</b>                          | <b>Present work</b> |
| In <sub>2</sub> O <sub>3</sub> /TiO <sub>2</sub>                          | 0.1 M Na <sub>2</sub> SO <sub>4</sub>                               | 350W Xe lamp | 0.65 (No mention)                                   | 2                   |
| In <sub>2</sub> S <sub>3</sub> /CdS/NiOOH                                 | 0.25 M Na <sub>2</sub> S and 0.35 M Na <sub>2</sub> SO <sub>3</sub> | 1 Sun        | 1.01 (1.23 V vs RHE)                                | 3                   |
| In <sub>2</sub> O <sub>3</sub> /In <sub>2</sub> S <sub>3</sub>            | 1 M NaOH                                                            | 300W Xe lamp | 0.53 (1.23 V vs RHE)                                | 4                   |
| N-doped In <sub>2</sub> O <sub>3</sub>                                    | 0.1 M Na <sub>2</sub> SO <sub>4</sub>                               | 300W Xe lamp | 0.2 (1.6 V vs RHE)                                  | 5                   |
| In <sub>2</sub> O <sub>3</sub> /Fe <sub>2</sub> O <sub>3</sub>            | 0.1 M NaOH                                                          | 300W Xe lamp | 0.04 (1.6 V vs RHE)                                 | 6                   |
| In <sub>2</sub> O <sub>3</sub> /ZnO                                       | 0.5 M Na <sub>2</sub> SO <sub>4</sub>                               | 300W Xe lamp | 0.36 (0.5 V vs Ag/AgCl)                             | 7                   |
| In <sub>2</sub> O <sub>3</sub> /Carbon                                    | Triethanolamine (8 vol%)                                            | 300W Xe lamp | 0.04 (0.2 V vs Hg/Hg <sub>2</sub> Cl <sub>2</sub> ) | 8                   |
| In <sub>2</sub> O <sub>3</sub> /In <sub>2</sub> S <sub>3</sub>            | 0.5 M Na <sub>2</sub> SO <sub>4</sub>                               | 1 Sun        | 0.14 (1.23 V vs RHE)                                | 9                   |
| Ti-Fe <sub>2</sub> O <sub>3</sub> /In <sub>2</sub> O <sub>3</sub>         | 1 M NaOH                                                            | 300W Xe lamp | 1.33 (1.23 V vs RHE)                                | 10                  |

|                                                                   |                                       |             |                     |    |
|-------------------------------------------------------------------|---------------------------------------|-------------|---------------------|----|
| Ti-Fe <sub>2</sub> O <sub>3</sub> /In <sub>2</sub> O <sub>3</sub> | 0.2 M K <sub>2</sub> SO <sub>4</sub>  | 1 Sun       | 0.52 (0.7 V vs RHE) | 11 |
| g-C <sub>3</sub> N <sub>4</sub> /In <sub>2</sub> O <sub>3</sub>   | 0.1 M Na <sub>2</sub> SO <sub>4</sub> | 35W Xe lamp | 1.3 (1.2 V vs RHE)  | 12 |
| In <sub>2</sub> O <sub>3</sub> /CuO-0.03 wt% GNRs                 | 1 M NaOH                              | 1 Sun       | 1.51 (1.6 V vs RHE) | 1  |

### Supplementary references:

1. L. Shi, D. Benetti, Q. Wei and F. Rosei, *Small*, 2023, 2300606.
2. H. Yang, J. Tian, Y. Bo, Y. Zhou, X. Wang and H. Cui, *J. Colloid Interface Sci.*, 2017, **487**, 258-265.
3. L. Wei, J. Zhang and M. Ruan, *Appl. Surf. Sci.*, 2021, **541**, 148431.
4. H. Xu, H. Chen, S. Chen, K. Wang and X. Wang, *Int. J. Hydrogen Energy*, 2021, **46**, 32445-32454.
5. X. Gan, R. Zheng, T. Liu, J. Meng, R. Chen, X. Sun and X. Sun, *Chem. Eur. J.*, 2017, **23**, 7264-7271.
6. L. Wu, S. Ma, J. Li and X. Li, *Thin Solid Films*, 2021, **724**, 138600.
7. F.-Y. Su and W.-D. Zhang, *Mater. Lett.*, 2018, **211**, 65-68.
8. R. Li, L. Sun, W. Zhan, Y.-A. Li, X. Wang and X. Han, *J. Mater. Chem. A*, 2018, **6**, 15747-15754.
9. B. R. Lee, S. Choi, W. S. Cheon, J. W. Yang, M. G. Lee, S. H. Park and H. W. Jang, *Electron. Mater. Lett.*, 2022, **18**, 391-399.
10. S. Wang, Y. Wang, J. Li, S. Guo, C. Meng, L. Pan, J.-J. Zou, Y. Shi, L. Zhang and Z. Yin, *ACS Appl. Nano Mater.*, 2023, **6**, 20240-20250.
11. M. Szkoda, A. Ilnicka, Z. Zarach, D. Roda, A. Nowak and K. Trzeciński, *J. Alloys Compd.*, 2023, **960**, 170924.
12. D. Sariket, A. Maity, S. Kundu and C. Bhattacharya, *J. Solid State Chem.*, 2022, **315**, 123484.
